# Supplementary material for: Effectiveness of Pain Neuroscience Education in Women with Dysmenorrhea: A Randomized Controlled Trial
Source: Research Square preprint supplement (doi:10.21203/rs.3.rs-8190944/v1), 2026-02-04
Supplement: Supplementary file 1 [file 44179f1350f54cea96e14bcd.docx]

# Table 1. Baseline demographic and clinical characteristics of the participants

| Variable | Category | Control Group (n=37) | PNE Group (n=37) | χ² / Fisher’s Exact; p |
| --- | --- | --- | --- | --- |
| Education level | High school | 1 (2.7%) | 1 (2.7%) | χ² = 0.32; p = 0.85 |
|  | University | 29 (78.4%) | 27 (73.0%) |  |
|  | Postgraduate | 7 (18.9%) | 9 (24.3%) |  |
| Daily working hours | 4–6 h | 1 (2.7%) | 6 (16.2%) | Fisher’s Exact = ns |
|  | 6–8 h | 7 (18.9%) | 9 (24.3%) |  |
|  | 8–10 h | 11 (29.7%) | 13 (35.1%) |  |
|  | ≥10 h | 5 (13.5%) | 2 (5.4%) |  |
|  | Not working | 13 (35.1%) | 7 (18.9%) |  |
| Daily physical activity level | 1–2 h | 9 (24.3%) | 5 (13.5%) | χ² = 4.43; p = 0.35 |
|  | 2–3 h | 10 (27.0%) | 7 (18.9%) |  |
|  | 4–6 h | 9 (24.3%) | 14 (37.8%) |  |
|  | ≥6 h | 9 (24.3%) | 11 (29.7%) |  |

Values are presented as n (%). Between-group comparisons were performed using the χ² test when expected cell frequencies met statistical assumptions and Fisher’s Exact test when expected counts were <5. “ns” denotes non-significant results (p > 0.05). PNE: Pain Neuroscience Education.

Table 2. Between-group and within-group comparisons of Short-Form McGill Pain Questionnaire (SF-MPQ) scores

| **Variable** | **Time** | **Control Group (n = 37) Mean ± SD** | **PNE Group (n = 37) Mean ± SD** | **t (Between Groups)** | **p** | **F (Time × Group)** | **p** | **η²** | **t (Within Groups) / Description** |
| --- | --- | --- | --- | --- | --- | --- | --- | --- | --- |
| SF-MPQ – Sensory Dimension | Pre-test | 13.27 ± 7.09 | 15.86 ± 7.17 | –1.57 | 0.12 | 88.32 | <0.001 | 0.55 | Control: No change |
|  | Post-test | 13.27 ± 7.09 | 7.62 ± 3.47 | 4.35 | <0.001 |  |  |  | PNE: 9.40 (p<0.001) |
| SF-MPQ – Affective Dimension | Pre-test | 3.84 ± 2.87 | 4.30 ± 2.80 | –0.70 | 0.49 | 46.63 | <0.001 | 0.39 | Control: No change |
|  | Post-test | 3.84 ± 2.87 | 1.35 ± 0.68 | 5.13 | <0.001 |  |  |  | PNE: 6.83 (p<0.001) |
| SF-MPQ – Total Score | Pre-test | 17.11 ± 9.47 | 20.16 ± 9.12 | –1.41 | 0.16 | 90.65 | <0.001 | 0.56 | Control: No change |
|  | Post-test | 17.11 ± 9.47 | 8.97 ± 3.74 | 4.86 | <0.001 |  |  |  | PNE: 9.52 (p<0.001) |

Values are presented as mean ± standard deviation (SD). SF-MPQ: Short-Form McGill Pain Questionnaire; PNE: Pain Neuroscience Education; η²: Eta squared. A p-value < 0.05 was considered statistically significant.

Table 3. Changes in maladaptive pain beliefs based on the Pain Beliefs Questionnaire (PBQ)

| **Variable** | **Time** | **Control Group (n = 37) Mean ± SD** | **PNE Group (n = 37) Mean ± SD** | **t (Between Groups)** | **p** | **F (Time × Group)** | **p** | **η²** | **t (Within Groups) / Description** |
| --- | --- | --- | --- | --- | --- | --- | --- | --- | --- |
| Organic Beliefs (PBQ-O) | Pre-test | 30.70 ± 7.32 | 31.30 ± 4.35 | –0.42 | 0.67 | 34.27 | <0.001 | 0.32 | Control: 20.45 (p=0.01) |
|  | Post-test | 22.30 ± 5.45 | 28.43 ± 2.02 | –6.42 | <0.001 |  |  |  | PNE: 3.36 (p<0.001) |
| Psychological Beliefs (PBQ-P) | Pre-test | 10.32 ± 3.67 | 11.03 ± 3.06 | –0.89 | 0.37 | 97.83 | <0.001 | 0.58 | Control: No change |
|  | Post-test | 10.32 ± 3.67 | 5.16 ± 1.61 | 7.83 | <0.001 |  |  |  | PNE: 9.89 (p<0.001) |
| Total Score (PBQ-T) | Pre-test | 41.03 ± 8.90 | 42.32 ± 6.52 | –0.72 | 0.48 | 4.21 | 0.04 | 0.06 | Control: No change |
|  | Post-test | 41.03 ± 8.90 | 44.73 ± 2.90 | –2.41 | 0.02 |  |  |  | PNE: –2.05 (p=0.04) |

Values are presented as mean ± standard deviation (SD). PBQ-O: Organic Beliefs subscale of the Pain Beliefs Questionnaire; PBQ-P: Psychological Beliefs subscale; PBQ-T: Total Pain Beliefs Questionnaire score; PNE: Pain Neuroscience Education; η²: Eta squared. A p-value < 0.05 was considered statistically significant.

Table 4. Impact of dysmenorrhea on daily life: Scale for Assessing the Impact of Dysmenorrhea on Daily Life (SAIDDL) scores

| **Variable** | **Time** | **Control Group (n = 37) Mean ± SD** | **PNE Group (n = 37) Mean ± SD** | **t (Between Groups)** | **p** | **F (Time × Group)** | **p** | **η²** | **t (Within Groups) / Description** |
| --- | --- | --- | --- | --- | --- | --- | --- | --- | --- |
| SAIDDL | Pre-test | 5.49 ± 2.29 | 5.84 ± 2.02 | –0.70 | 0.49 | 126.55 | <0.001 | 0.64 | Control: 11.25 (p<0.001) |
|  | Post-test | 5.49 ± 2.29 | 3.92 ± 1.69 | 3.35 | <0.001 |  |  |  | PNE: Significant improvement |

Values are presented as mean ± standard deviation (SD). SAIDDL: Scale for Assessing the Impact of Dysmenorrhea on Daily Life; PNE: Pain Neuroscience Education; η²: Eta squared. A p-value < 0.05 was considered statistically significant.
