# Supplementary material for: Effectiveness of Pain Neuroscience Education in Women with Dysmenorrhea: A Randomized Controlled Trial
Source: Research Square preprint supplement (doi:10.21203/rs.3.rs-8190944/v1), 2026-02-04
Supplement: Supplementary file 2 [file 98070df1ca82e7252593f755.docx]

# CONSORT 2010 Checklist

| No | CONSORT Item | Checklist Description | Reported? |
| --- | --- | --- | --- |
| 1a | Title | Identification as a randomized trial | ✓ |
| 1b | Abstract | Structured summary of trial design, methods, results | ✓ |
| 2a | Introduction | Scientific background & rationale | ✓ |
| 2b | Introduction | Specific objectives or hypotheses | ✓ |
| 3a | Methods | Description of trial design (parallel, 1:1) | ✓ |
| 3b | Methods | Important changes to methods after trial start | ✓ / Not applicable |
| 4a | Methods | Eligibility criteria for participants | ✓ |
| 4b | Methods | Settings and locations of data collection | ✓ |
| 5 | Methods | Detailed description of interventions | ✓ |
| 6a | Methods | Pre-specified primary & secondary outcomes | ✓ |
| 6b | Methods | Changes to outcomes after trial start | ✓ / Not applicable |
| 7a | Methods | How sample size was determined | ✓ |
| 7b | Methods | Interim analyses/stopping rules | ✓ / Not applicable |
| 8a | Methods | Method of random allocation sequence generation | ✓ |
| 8b | Methods | Type of randomization and details of restriction | ✓ |
| 9 | Methods | Allocation concealment mechanism | ✓ |
| 10 | Methods | Who generated allocation sequence; who enrolled participants | ✓ |
| 11a | Methods | Who was blinded after assignment | ✓ |
| 11b | Methods | Similarity of interventions | ✓ / Not applicable |
| 12a | Methods | Statistical analysis methods for primary/secondary outcomes | ✓ |
| 12b | Methods | Additional statistical analyses | ✓ / Not applicable |
| 13a | Results | Participant flow diagram | ✓ |
| 13b | Results | Losses and exclusions after randomization | ✓ |
| 14a | Results/Methods | Recruitment: dates of recruitment and follow-up | ✓ |
| 14b | Results | Why trial ended or stopped | ✓ |
| 15 | Results | Baseline demographic and clinical characteristics | ✓ |
| 16 | Results | Number analyzed in each group | ✓ |
| 17a | Results | Outcome results for each group | ✓ |
| 17b | Results | Effect size and precision (e.g., 95% CI) | ✓ |
| 18 | Results | Ancillary analyses | ✓ / Not applicable |
| 19 | Results | Harms/unintended effects | ✓ |
| 20 | Discussion | Trial limitations | ✓ |
| 21 | Discussion | Generalizability of findings | ✓ |
| 22 | Discussion | Interpretation consistent with results | ✓ |
| 23 | Other | Trial registration | ✓ |
| 24 | Other | Where the full trial protocol can be accessed | ✓ / Not applicable |
| 25 | Other | Sources of funding | ✓ |
